# Supplementary material for: Enhanced Activity of Exportin‐1/CRM1 in Neurons Contributes to Autophagy Dysfunction and Senescent Features in Old Mouse Brain
Source: Hindawi journal article supplement (doi:10.1155/2021/6682336), 2021-01-01
Supplement: f1 [file 6682336.f1.pdf]

## **SUPPLEMENTARY MATERIAL**

**Enhanced activity of Exportin-1/CRM1 in neurons contributes to autophagy dysfunction and senescent features in old mouse brain.**

Elisa Gorostieta-Salas<sup>1</sup>, Daniel Moreno-Blas<sup>1</sup>, Cristian Gerónimo-Olvera<sup>2</sup>, Bulmaro Cisneros<sup>3</sup>, Felipe A Court<sup>2,4,5</sup>, Susana Castro-Obregón<sup>1\*</sup>.

Figure S1

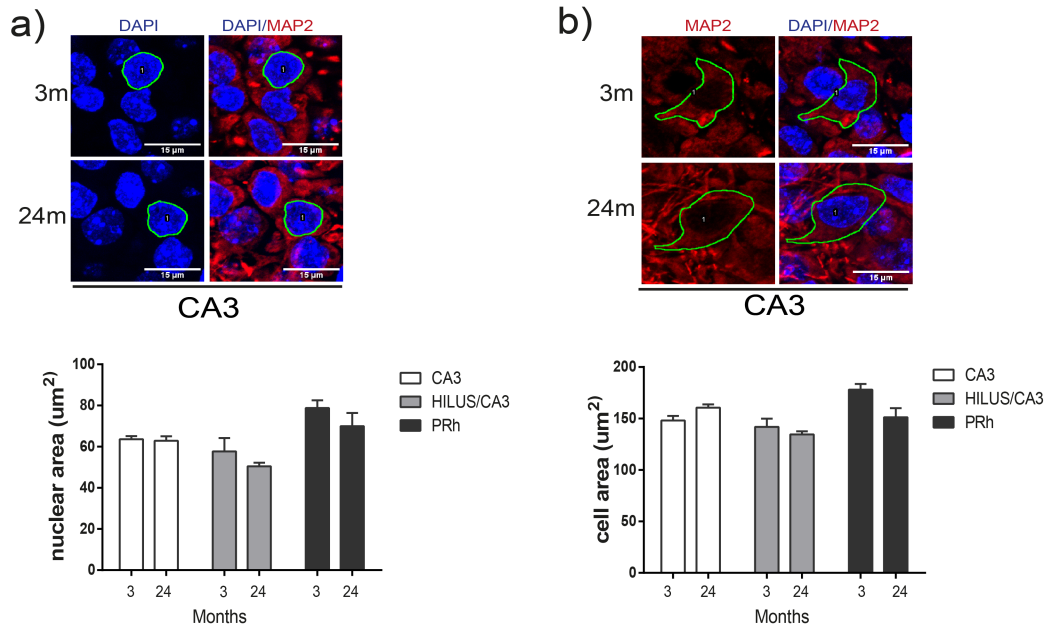

**Supplementary Figure 1. The cellular area of neurons in young and old mice is similar.** The nuclear **a)** and cytoplasmic **b)** areas (expressed in  $\mu\text{m}^2$ ) of neurons (identified by MAP2 expression) were quantified in the hippocampal and cortical regions of brains from 3 and 24 months old mice. The graph below each representative image expresses the mean  $\pm$  SEM. No significant differences were found, analyzed by unpaired t-Test Student. From 3 brains, the total number of neurons counted was: CA3,  $n=248$  from 3 months-old and  $n=203$  from 24 months-old; Hilus,  $n=148$  from 3 months-old and  $n=132$  from 24 months-old; PRh,  $n=133$  from 3 months-old and  $n=133$  from 24 months-old. Representative neurons of the CA3 regions are shown. Scale bars represent  $15 \mu\text{m}$ .

Figure S2

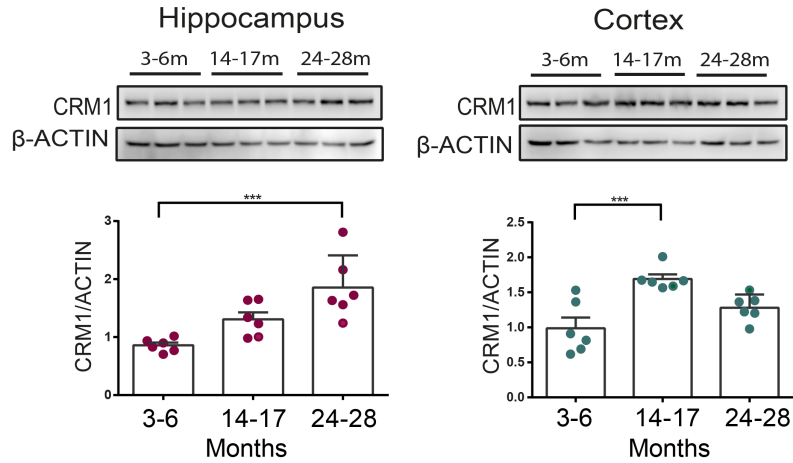

**Supplementary Figure S2. CRM1 accumulates in hippocampus and cortex with age.** Western blot analysis showing the expression of CRM1 protein in hippocampus and cortex of wild type mice at the indicated ages. Graph represents the mean of densitometry analysis of Western blot analysis from **six** animals per age group expressed in arbitrary units. Bars correspond to the mean  $\pm$  SEM from **six** independent experiments, with significant differences determined by One-way Anova and Dunnet as *post hoc* test; \*\*\*p < 0.001.

Figure S3

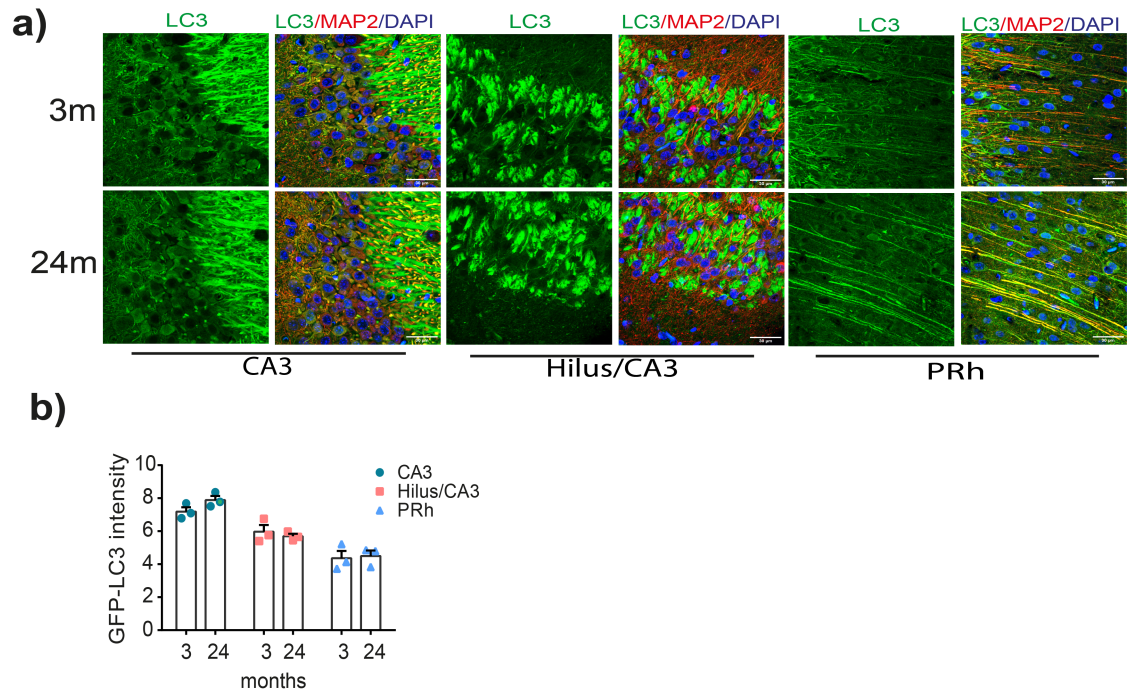

**Supplementary Figure S3. Pattern distribution and expression level of GFP-LC3 did not change during brain aging.** **a)** Confocal images showing GFP-LC3 signal in neurons (expressing MAP2) of hippocampus and perirhinal cortex (PRh) from 3 and 24 months-old GFP-LC3 transgenic mice. **b)** Graph represents pixel density of GFP-LC3 signal in the different brain regions analyzed in three brains per age. We noticed an increment of GFP-LC3 along axons in PRh region, but quantifying GFP-LC3 intensity we found no significant difference. Bars represent the mean  $\pm$  SEM.
